# Supplementary material for: Glutamine-Expanded Ataxin-7 Alters TFTC/STAGA Recruitment and Chromatin Structure Leading to Photoreceptor Dysfunction
Source: PLOS journal article supplement (doi:10.1371/journal.pbio.0040067), 2006-02-22
Supplement: S3 (10.1371/journal.pbio.0040067.s003) [file journal.pbio.0040067.s003]

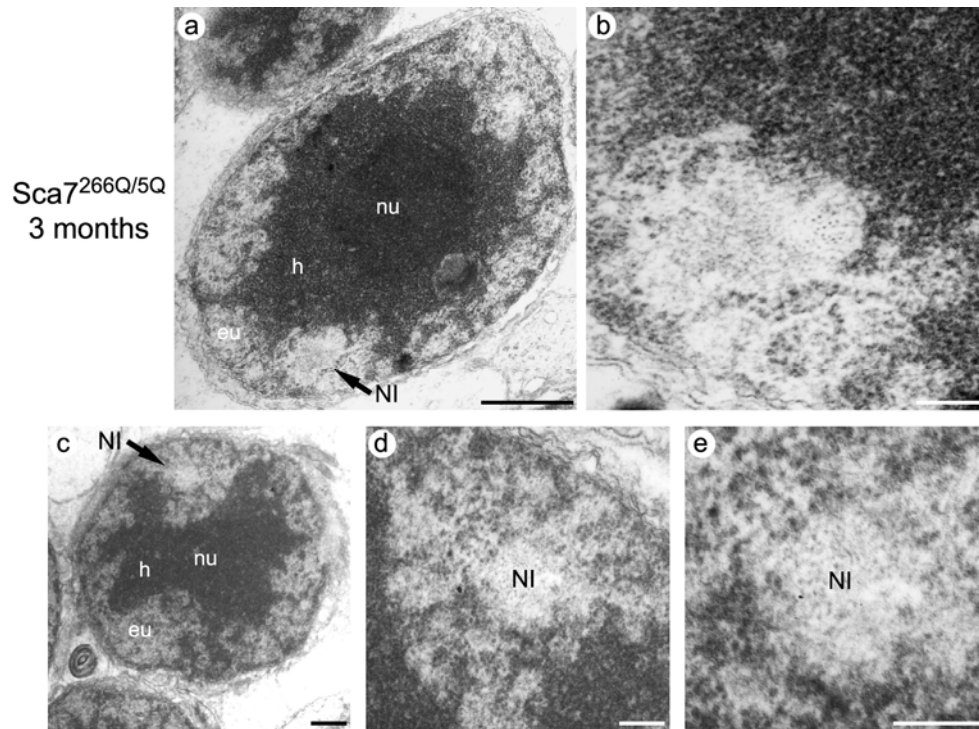

**Figure S3: Ultrastructure of NIs found in rod photoreceptors from 3-month-old *Sca7*<sup>266Q/5Q</sup> mice.**

Examples of nuclear inclusions (NI, indicated by large arrows in a and c) found within rods by conventional electron microscopy. At higher magnifications, the NI appeared as a pale stained structure surrounded by euchromatin (eu), distinct from the darkly stained adjacent heterochromatin (h) territory and central nucleolus (Nu). Scale bars are 1  $\mu\text{m}$  in a, 0.25  $\mu\text{m}$  in b, d, e and 0.5  $\mu\text{m}$  in c. Abbreviations: eu, euchromatin; h, heterochromatin; NI, nuclear inclusion; nu, nucleolus.
