# Supplementary material for: Glutamine-Expanded Ataxin-7 Alters TFTC/STAGA Recruitment and Chromatin Structure Leading to Photoreceptor Dysfunction
Source: PLOS journal article supplement (doi:10.1371/journal.pbio.0040067), 2006-02-22
Supplement: S5 (10.1371/journal.pbio.0040067.s005) [file journal.pbio.0040067.s005]

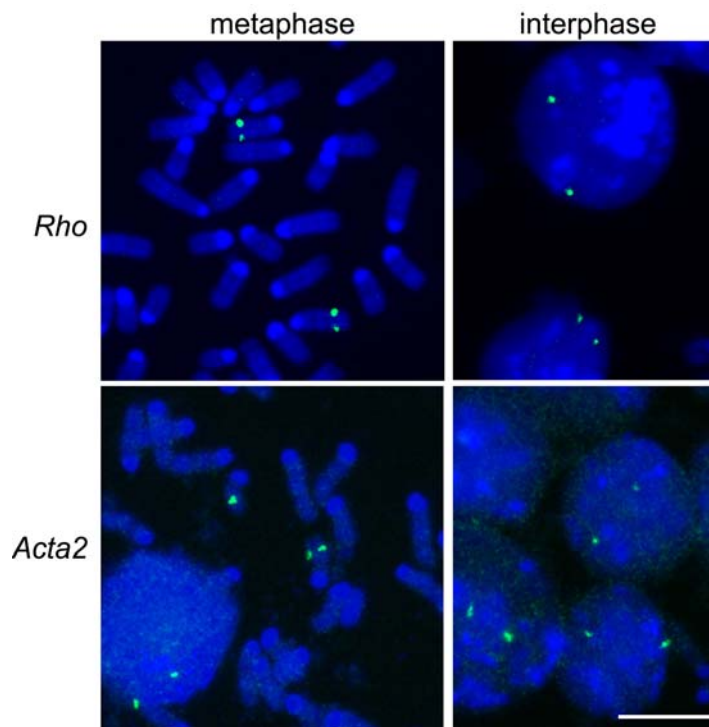

**Figure S5: Demonstration of FISH probes specificity.**

FISH of *Rho* and *Acta2* probes to mouse ES cell spreads revealed specific hybridization on metaphase chromosomes and interphase nuclei, counterstained with DAPI. Scale bar is 5  $\mu$ m.
