# Supplementary material for: Glutamine-Expanded Ataxin-7 Alters TFTC/STAGA Recruitment and Chromatin Structure Leading to Photoreceptor Dysfunction
Source: PLOS journal article supplement (doi:10.1371/journal.pbio.0040067), 2006-02-22
Supplement: S7 (10.1371/journal.pbio.0040067.s007) [file journal.pbio.0040067.s007]

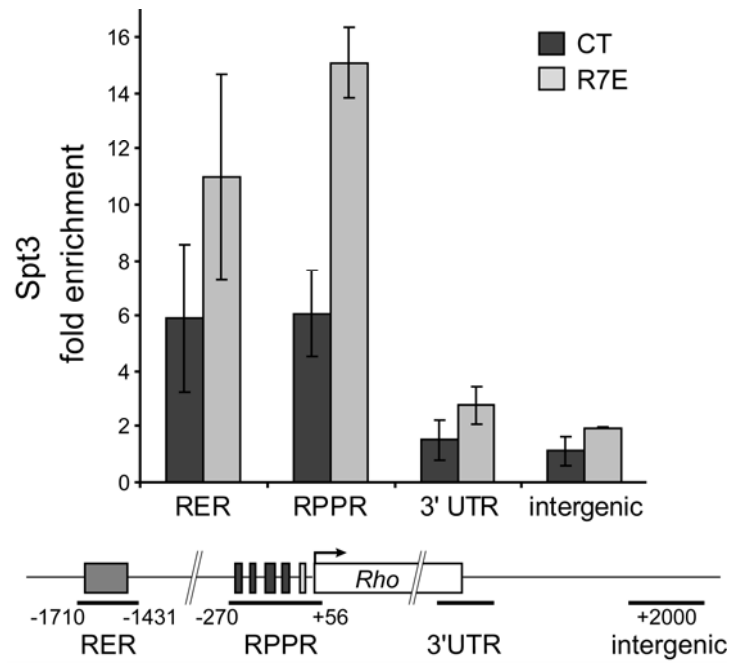

**Figure S7: Increased recruitment of TFTC-type complexes containing polyglutamine expanded ATXN7 at different regions of the *Rho* gene.**

Chromatin immunoprecipitation assays (ChIP) were performed using formaldehyde-fixed chromatin extracts of retina from 2 month-old control (WT or R7N; dark grey) and R7E (light grey) mice. Specific regions within the *Rho* gene were analyzed by real-time PCR, after ChIP using an antibody against a TFTC-specific subunit (Spt3). Quantification of fold enrichment was calculated as indicated in Figure S9. Each bar represents the mean value  $\pm$  SEM ( $n = 4-6$ ).
